# Supplementary material for: Alternative Development and Processing of Fermented Beverage and Tempeh Using Green Beans from Four Genotypes of Lupinus mutabilis
Source: MDPI journal article supplement (doi:10.3390/fermentation9070590), 2023-06-25
Supplement: s1 [file s1]

**Table S1.** Quality parameters and proximate analysis of fermented beverage as affected by germplasm (G), inoculum dose (ID)

| S.O.V.                    | TSC   | pH   | Alcoholic strength | Total alkaloids | Dry matter | Protein | Crude fibre | Fat    | Ash content | Calcium |
|---------------------------|-------|------|--------------------|-----------------|------------|---------|-------------|--------|-------------|---------|
| G                         | NS    | NS   | **                 | **              | **         | **      | **          | **     | NS          | NS      |
| SD                        | NS    | NS   | NS                 | NS              | NS         | **      | **          | **     | NS          | NS      |
| G x SD                    | NS    | NS   | *                  | *               | *          | **      | **          | *      | *           | *       |
| LSD Test‡                 |       |      |                    |                 |            |         |             |        |             |         |
| Germplasm                 |       |      |                    |                 |            |         |             |        |             |         |
| Andino                    | 11.80 | 4.11 | 6.35 a             | 0.82 a          | 15.50 a    | 2.38 a  | 1.85 a      | 0.17 a | 0.20        | 0.04    |
| Guaranguito               | 9.80  | 4.07 | 4.93 c             | 0.88 a          | 11.62 b    | 1.89 ab | 1.26 b      | 0.14 a | 0.17        | 0.02    |
| Ecuadorian                | 10.60 | 3.95 | 5.44 b             | 0.57 b          | 12.20 ab   | 1.36 b  | 1.02 c      | 0.07 b | 0.16        | 0.03    |
| Peruvian                  | 11.25 | 4.08 | 5.45 b             | 1.07 a          | 13.06 a    | 1.56 b  | 0.95 c      | 0.09 b | 0.17        | 0.04    |
| Starter Doses             |       |      |                    |                 |            |         |             |        |             |         |
| 1.50%                     | 10.90 | 4.12 | 5.59               | 0.86            | 13.12      | 2.16 a  | 1.77 a      | 0.15 a | 0.20        | 0.03    |
| 2.50%                     | 10.80 | 3.98 | 5.49               | 0.81            | 13.06      | 1.45 b  | 0.76 b      | 0.08 b | 0.15        | 0.03    |
| Germplasm x Starter Doses |       |      |                    |                 |            |         |             |        |             |         |
| Andino                    |       |      |                    |                 |            |         |             |        |             |         |
| 1.50%                     | 11.90 | 4.13 | 6.30 a             | 0.84 a          | 15.70 a    | 2.47 a  | 1.93 a      | 0.21 a | 0.21a       | 0.05 a  |
| 2.50%                     | 11.70 | 4.09 | 6.40 a             | 0.82 a          | 15.35 a    | 2.29 a  | 1.76 a      | 0.13 b | 0.13 b      | 0.03 ab |
| Guaranguito               |       |      |                    |                 |            |         |             |        |             |         |
| 1.50%                     | 9.69  | 4.04 | 4.90 b             | 0.91 a          | 11.42 b    | 2.01 a  | 1.22 b      | 0.19 a | 0.19 a      | 0.02 b  |
| 2.50%                     | 9.66  | 4.09 | 4.95 b             | 0.85 a          | 11.83 b    | 1.77 b  | 1.29 b      | 0.09 b | 0.15 a      | 0.02 b  |
| Ecuadorian                |       |      |                    |                 |            |         |             |        |             |         |
| 1.50%                     | 10.66 | 4.22 | 5.50 a             | 0.64 b          | 11.53 b    | 1.45 b  | 1.07        | 0.10 a | 0.19 a      | 0.04 a  |
| 2.50%                     | 10.68 | 3.67 | 5.38 b             | 0.50 b          | 12.89 b    | 1.27 b  | 0.97        | 0.03 b | 0.13 a      | 0.02 b  |
| Peruvian                  |       |      |                    |                 |            |         |             |        |             |         |
| 1.50%                     | 11.18 | 4.10 | 5.65 a             | 1.17 a          | 12.99 b    | 1.65 b  | 1.01        | 0.11 a | 0.20 a      | 0.05 a  |
| 2.50%                     | 11.13 | 4.07 | 5.25 b             | 0.97 a          | 13.13 b    | 1.47 b  | 0.89        | 0.07 b | 0.14 b      | 0.03 ab |

(\*) and (\*\*) significant at  $p < 0.05$ ,  $p < 0.01$ , respectively, NS, not significant. S.O.V. Source of Variance ‡ For each factor, values followed by different letters, within the same column and factor were significantly different ( $p < 0.05$ ), according to the least significant difference (LSD) test.

**Table 2.** Quality parameters and proximate analysis of tempeh as affected by germplasm (G), inoculum dose (ID).

| S.O.V.                    | Total alkaloids | Dry matter | Protein  | Crude fibre | Fat  | Ash content | Calcium |
|---------------------------|-----------------|------------|----------|-------------|------|-------------|---------|
| G                         | **              | **         | **       | NS          | NS   | NS          | **      |
| SD                        | **              | **         | **       | **          | NS   | NS          | **      |
| G x SD                    | *               | NS         | *        | *           | NS   | NS          | *       |
| LSD Test†                 |                 |            |          |             |      |             |         |
| Germplasm                 |                 |            |          |             |      |             |         |
| Andino                    | 0.63 b          | 30.44 a    | 26.33 a  | 17.79       | 3.18 | 0.39        | 0.98 a  |
| Guaranguito               | 1.04 a          | 23.83 b    | 15.10 b  | 13.09       | 2.08 | 0.27        | 0.38 b  |
| Ecuadorian                | 1.04 a          | 25.55 ab   | 17.85 b  | 14.01       | 2.64 | 0.28        | 0.14 c  |
| Peruvian                  | 0.87 a          | 29.28 a    | 15.41 b  | 14.12       | 2.27 | 0.31        | 0.66 a  |
| Starter doses             |                 |            |          |             |      |             |         |
| 1.50%                     | 1.03 a          | 32.15 a    | 25.73 a  | 18.42 a     | 2.83 | 0.40        | 0.99 a  |
| 2.50%                     | 0.74 b          | 22.45 b    | 11.65 b  | 11.11 b     | 2.25 | 0.24        | 0.10 b  |
| Germplasm x Starter Doses |                 |            |          |             |      |             |         |
| Andino                    |                 |            |          |             |      |             |         |
| 1.50%                     | 0.70 b          | 32.38      | 29.29 a  | 18.46 a     | 3.38 | 0.41        | 1.03 a  |
| 2.50%                     | 0.56 b          | 28.53      | 23.35 b  | 17.12 a     | 2.98 | 0.37        | 0.93 a  |
| Guaranguito               |                 |            |          |             |      |             |         |
| 1.50%                     | 1.08 a          | 24.45      | 15.98 c  | 14.20 b     | 2.12 | 0.29        | 0.40 b  |
| 2.50%                     | 0.99 a          | 23.20      | 14.24 c  | 11.98 c     | 2.04 | 0.24        | 0.36 b  |
| Ecuadorian                |                 |            |          |             |      |             |         |
| 1.50%                     | 1.07 a          | 26.89      | 18.65 bc | 14.54 b     | 2.80 | 0.29        | 0.16 c  |
| 2.50%                     | 1.01 a          | 24.17      | 17.15 bc | 13.56 c     | 2.49 | 0.28        | 0.12 c  |
| Peruvian                  |                 |            |          |             |      |             |         |
| 1.50%                     | 0.93 a          | 31.03      | 16.22 c  | 15.04 b     | 2.31 | 0.33        | 0.70 a  |
| 2.50%                     | 0.81 a          | 27.54      | 14.60 c  | 13.21 c     | 2.24 | 0.30        | 0.61 a  |

(\*) and (\*\*) significant at  $p < 0.05$ ,  $p < 0.01$ , respectively, NS, not significant. S.O.V. Source of Variance ‡ For each factor, values followed by different letters, within the same column and factor were significantly different ( $p < 0.05$ ), according to the least significant difference (LSD) test.

**Table 3.** Significance of the differences in the mean values of proximate analysis parameters of fermented beverage in the post hoc LSD test ( $p < 0.05$ ).

| <i>S. cerevisiae</i>   | 1.5%               | 2.5%               |
|------------------------|--------------------|--------------------|
| Alcoholic Strength (%) |                    |                    |
| Andino                 | 6.15 <sup>az</sup> | 6.41 <sup>az</sup> |
| Guaranguito            | 4.71 <sup>cy</sup> | 4.61 <sup>cy</sup> |
| Ecuadorian             | 5.42 <sup>bz</sup> | 5.30 <sup>bz</sup> |
| Peruvian               | 5.55 <sup>bz</sup> | 5.11 <sup>bz</sup> |
| Total alkaloids (%)    |                    |                    |
| Andino                 | 0.87 <sup>bz</sup> | 0.85 <sup>bz</sup> |
| Guaranguito            | 0.98 <sup>bz</sup> | 0.93 <sup>bz</sup> |
| Ecuadorian             | 0.71 <sup>bz</sup> | 0.68 <sup>bz</sup> |
| Peruvian               | 1.31 <sup>az</sup> | 1.27 <sup>az</sup> |
| Protein (%)            |                    |                    |
| Andino                 | 2.78 <sup>az</sup> | 2.41 <sup>az</sup> |
| Guaranguito            | 2.36 <sup>az</sup> | 1.93 <sup>az</sup> |
| Ecuadorian             | 1.65 <sup>bz</sup> | 1.47 <sup>bz</sup> |
| Peruvian               | 1.86 <sup>bz</sup> | 1.69 <sup>bz</sup> |
| Crude Fibre (%)        |                    |                    |
| Andino                 | 2.27 <sup>az</sup> | 2.03 <sup>az</sup> |
| Guaranguito            | 1.36 <sup>bz</sup> | 1.27 <sup>bz</sup> |
| Ecuadorian             | 1.12 <sup>bz</sup> | 1.01 <sup>bz</sup> |
| Peruvian               | 1.17 <sup>bz</sup> | 1.05 <sup>bz</sup> |
| Fat (%)                |                    |                    |
| Andino                 | 0.24 <sup>az</sup> | 0.17 <sup>az</sup> |
| Guaranguito            | 0.26 <sup>az</sup> | 0.13 <sup>ay</sup> |
| Ecuadorian             | 0.12 <sup>bz</sup> | 0.04 <sup>by</sup> |
| Peruvian               | 0.14 <sup>bz</sup> | 0.06 <sup>by</sup> |
| Calcium (%)            |                    |                    |
| Andino                 | 0.06 <sup>az</sup> | 0.04 <sup>ay</sup> |
| Guaranguito            | 0.03 <sup>bz</sup> | 0.02 <sup>bz</sup> |
| Ecuadorian             | 0.06 <sup>az</sup> | 0.03 <sup>ay</sup> |
| Peruvian               | 0.07 <sup>az</sup> | 0.04 <sup>ay</sup> |

The data represent average values of 12 tests. Different letters (a–d) in the same column indicate significant differences between cultivars, according to LSD test, at  $p < 0.05$ . Different letters (x–z) in the same row indicate significant differences between starter dosage within each cultivar, according to LSD test, at  $p < 0.05$ .

**Table 4.** Significance of the differences in mean values of quality and proximate analysis parameters of tempeh in the post hoc LSD test ( $p < 0.05$ ).

| <i>R. oligosporus</i>      | 0.015%              | 0.025%              |
|----------------------------|---------------------|---------------------|
| <b>Total alkaloids (%)</b> |                     |                     |
| Andino                     | 0.82 <sup>bz</sup>  | 0.67 <sup>bzy</sup> |
| Guaranguito                | 1.32 <sup>az</sup>  | 1.2 <sup>az</sup>   |
| Ecuadorian                 | 1.38 <sup>az</sup>  | 0.99 <sup>ay</sup>  |
| Peruvian                   | 0.98 <sup>bz</sup>  | 0.72 <sup>by</sup>  |
| <b>Protein (%)</b>         |                     |                     |
| Andino                     | 32.43 <sup>az</sup> | 28.65 <sup>az</sup> |
| Guaranguito                | 19.65 <sup>bz</sup> | 17.81 <sup>bz</sup> |
| Ecuadorian                 | 20.12 <sup>bz</sup> | 18.07 <sup>bz</sup> |
| Peruvian                   | 19.13 <sup>bz</sup> | 17.45 <sup>bz</sup> |
| <b>Crude fibre (%)</b>     |                     |                     |
| Andino                     | 20.47 <sup>az</sup> | 18.45 <sup>az</sup> |
| Guaranguito                | 16.58 <sup>az</sup> | 13.38 <sup>by</sup> |
| Ecuadorian                 | 17.08 <sup>az</sup> | 16.28 <sup>az</sup> |
| Peruvian                   | 17.85 <sup>az</sup> | 15.56 <sup>az</sup> |
| <b>Fat (%)</b>             |                     |                     |
| Andino                     | 4.83 <sup>az</sup>  | 3.41 <sup>ay</sup>  |
| Guaranguito                | 2.86 <sup>bz</sup>  | 2.66 <sup>bz</sup>  |
| Ecuadorian                 | 3.13 <sup>az</sup>  | 2.73 <sup>bz</sup>  |
| Peruvian                   | 2.87 <sup>bz</sup>  | 2.74 <sup>bz</sup>  |
| <b>Calcium (%)</b>         |                     |                     |
| Andino                     | 1.68 <sup>az</sup>  | 1.51 <sup>az</sup>  |
| Guaranguito                | 0.54 <sup>bz</sup>  | 0.49 <sup>cz</sup>  |
| Ecuadorian                 | 0.21 <sup>bz</sup>  | 0.16 <sup>dy</sup>  |
| Peruvian                   | 0.96 <sup>bz</sup>  | 0.81 <sup>bz</sup>  |

The data represent average values of 12 tests. Different letters (a–d) in the same column indicate significant differences between cultivars, according to LSD test, at  $p < 0.05$ . Different letters (x–z) in the same row indicate significant differences between starter dosage within each cultivar, according to LSD test, at  $p < 0.05$ .
